# Supplementary material for: Experimental hookworm infection and escalating gluten challenges are associated with increased microbial richness in celiac subjects
Source: PubMed Central journal article supplement (PMC4585380; doi:10.1038/srep13797), 2015-09-18
Supplement: srep13797-s1.pdf [file srep13797-s1.pdf]

## Supplementary information

Giacomin, P., Zakrzewski, M., Croese, J., Su, X., Sotillo J., McCann, L., Navarro, S., Mitreva, M., Krause, L., Loukas, A. & Cantacessi, C. Experimental hookworm infection and escalating gluten challenges are associated with increased microbial richness in celiac subjects.

**Figure S1**

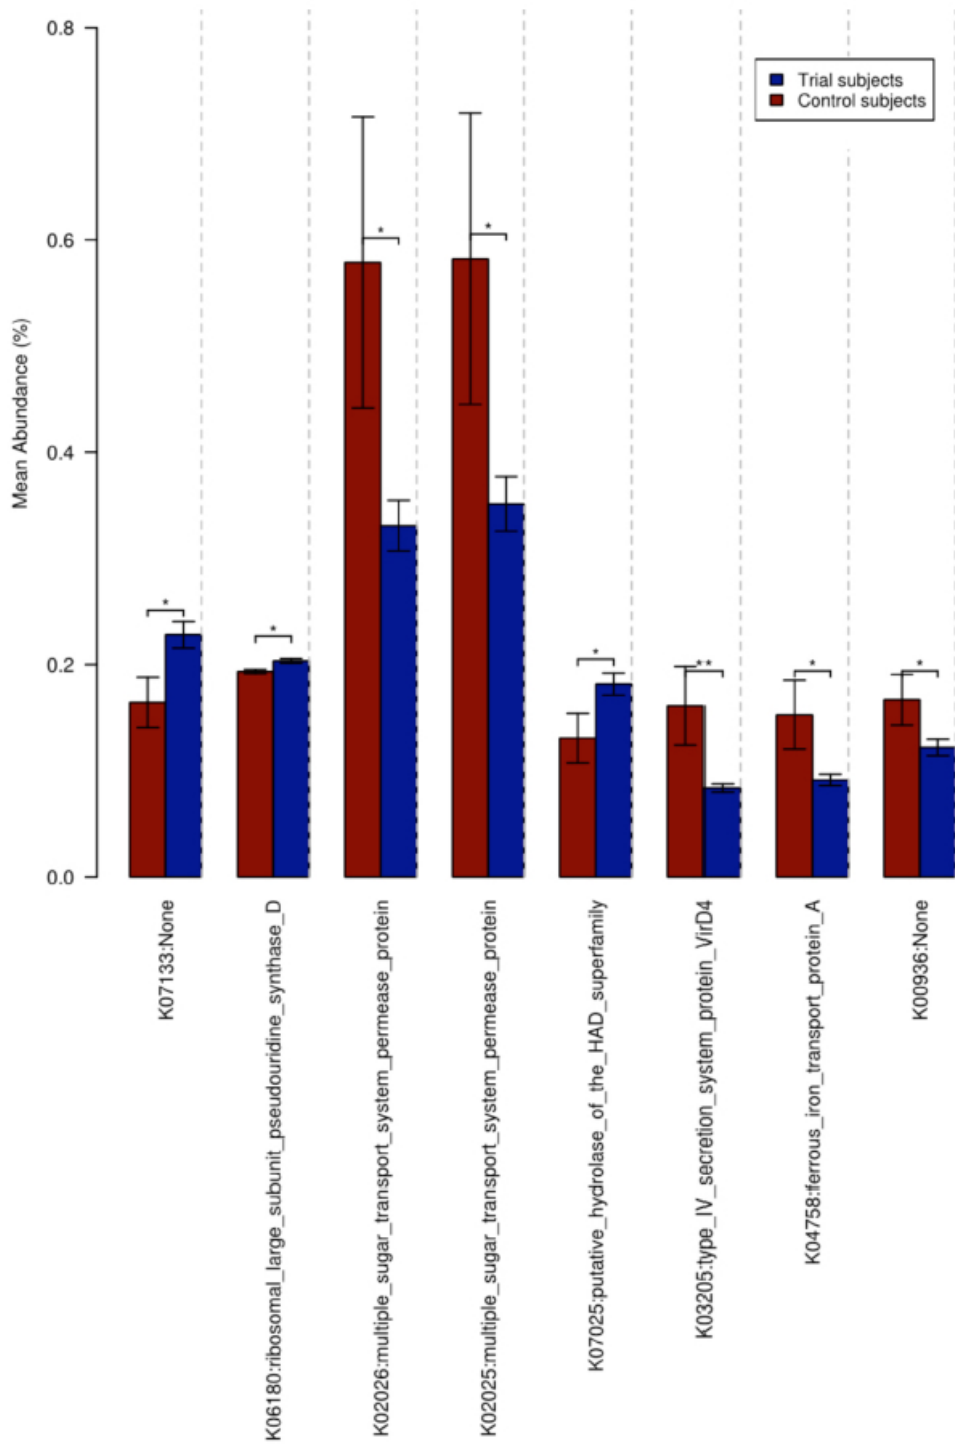

**Figure S1:** Differences in PICRUSt predicted (KEGG) metabolic pathways inferred from the fecal microbial communities of Trial subjects prior to hookworm infection (T0) and of active celiac disease Control subjects.

**Table S1**

| <b>Subject</b> | <b>Age</b> | <b>Sex</b> | <b>Marsh score</b> |
|----------------|------------|------------|--------------------|
| ID1            | 43         | F          | M0                 |
| ID10           | 51         | M          | M2                 |
| ID12           | 67         | F          | M0                 |
| ID2            | 39         | F          | M0                 |
| ID3            | 47         | F          | M0                 |
| ID6            | 39         | M          | M0                 |
| ID7            | 63         | M          | M0                 |
| ID9            | 62         | F          | M1                 |
| C7             | 53         | F          | M3b                |
| C9             | 29         | F          | M3a                |
| C10            | 76         | M          | M3b                |

**Table S1:** Table of trial subject identification (ID) numbers or control subject (C) numbers displaying age, sex and baseline clinical diagnosis (T0 Marsh Score).

**Table S2**

| rank   | taxon           | t-test p-value (FDR)* | Rank test p-value (FDR)** | Median Control | Median Trial |
|--------|-----------------|-----------------------|---------------------------|----------------|--------------|
| phylum | Bacteroidetes   | 0.04<br>(0.13)        | 0.13 (0.22)               | 39.55          | 63.48        |
|        | Firmicutes      | 0.07<br>(0.13)        | 0.19 (0.22)               | 52.14          | 31.62        |
| Class  | Bacteroidia     | 0.04<br>(0.17)        | 0.13 (0.26)               | 39.55          | 63.48        |
|        | Erysipelotrichi | 0.02<br>(0.17)        | 0.048 (0.2)               | 3.5            | 0.64         |
|        | Clostridia      | 0.13<br>(0.23)        | 0.28 (0.37)               | 48.63          | 30.88        |
| Genus  | Ruminococcus    | 0.001<br>(0.03)       | 0.01 (0.13)               | 6              | 0.8          |
|        | Lachnospira     | 0.03<br>(0.25)        | 0.01 (0.13)               | 0.04           | 0.7          |

\*based on square root transformed relative taxa counts

\*\*based on relative taxa counts

**Table S2:** Comparison of taxa at phylum, class and genus level between Control and Trial subjects.
